# Associations between cardiovascular risk factors, stroke severity, and post-stroke cognition: a moderated mediation analysis

1 **Jianian Hua<sup>1,2#</sup>, Yixiu Zhou<sup>1,2#</sup>, Licong Chen<sup>1</sup>, Shanshan Diao<sup>1,\*</sup> and Qi Fang<sup>1,\*\*</sup>**

2 <sup>1</sup> Department of Neurology, The First Affiliated Hospital of Soochow University, Suzhou, Jiangsu,  
3 PR China.

4 <sup>2</sup> Medical College of Soochow University, Suzhou 215123, PR China.

5 <sup>#</sup>These authors contributed equally.

6

7 \*Correspondence:

8 Shanshan Diao

9 Diaoshanshan1015@163.com

10 \*\* Correspondence:

11 Qi Fang

12 fangqi\_008@126.com

13 Keywords: stroke, cognitive function, structural equation models, cross-sectional study

14

15

16

17

18

19

20

21

22

23

24

25

26

27

28

29

30

31

32 Abstract

33 Introduction: Cognitive impairment may affect one third of the stroke survivors. Cardiovascular risk  
34 factors have been described to be risk factors for lower cognition after stroke. However, most  
35 previous studies only used multivariate regression models to learn the association. The aim of our  
36 study was to investigate whether the effect of cardiovascular risk factors on cognition after stroke  
37 was mediated by stroke severity, the estimated effect of direct and indirect pathways, and the  
38 moderated association.

39 Method: In this incident cross-sectional study, 300 stroke patients received cognitive test within  
40 seven days after stroke. Cognitive tested was performed by the Chinese version of Mini-Mental State  
41 Examination (MMSE). A second stage dual moderated mediation model was used the select  
42 moderation variables. Finally, we constructed a structural equation model to test the indirect effects  
43 of cardiovascular and demographic factors on cognition stroke severity, the direct effects of  
44 predictors on cognition, and the moderated effects of hypertension.

45 Results: Age (estimate, -0.114; 95% bias-corrected CI, -0.205, -0.032; P<0.001), female (estimate, -  
46 2.196; 95% bias-corrected CI, -4.359, -0.204; P=0.009), lower education (estimate, -0.893; 95% bias-  
47 corrected CI, -1.662, -0.160; P<0.001), stroke severity (estimate, -1.531; 95% bias-corrected CI, -  
48 3.015, -0.095), hypertension (estimate, -2.242; 95% bias-corrected CI, -4.436, -0.242; P=0.003) and  
49 atrial fibrillation (estimate, -4.930; 95% bias-corrected CI, -12.864, -0.126; P=0.048) were directly  
50 associated with lower cognitive function after stroke. We found no evidence that cardiovascular risk  
51 factors indirectly correlated cognitive function through stroke severity. The combination of  
52 hypertension could alleviate the negative effect of atrial fibrillation on cognition (estimate, -3.928; 95%  
53 bias-corrected CI, -7.954, 0.029; P=0.009).

54 Conclusions: We explored the complex relationship between cardiovascular risk factors, stroke  
55 severity, and cognitive function after stroke. Using our method, researchers using other dataset could  
56 repeat the analysis and achieve a better understanding of the relationship. Future researchers are  
57 needed to find whether the moderated associations were casual or modifiable.

58

59

60

61

62

63

64

65

66

67

68

69

70

71

72

## 73 **1 Introduction**

74 Nowadays, the incidence rate of ischemic stroke is growing<sup>1</sup>. It is well known that stroke is  
75 associated with acute cognitive decline and increased risk of dementia<sup>2,3</sup>. The post-stroke cognitive  
76 impairment (PSCI) is an important sequela of stroke. The declined cognition brings great burden to  
77 caregivers, economic, and global health<sup>4,5</sup>. Therefore, it is imperative to learn the modifiable risk  
78 factors for PSCI.

79 Recently, cardiovascular disease and stroke severity are of great interest in studies learning PSCI, due  
80 to the following reason. They are well-known risk factors for dementia in any of the population<sup>6,7</sup>.  
81 Heart and brain communicated intensively regarding to cognition. Patients with stroke had more  
82 cardiovascular comorbidity<sup>8</sup>. The previous results are inconclusive or conflicting<sup>9,10</sup>. However, most  
83 studies analyzed them through multiple regression, but the interaction relationship and the multiple  
84 routes were seldomly learned.

85 The post-stroke cognitive decline was reported to be composed of incident cognitive decline  
86 immediately after stroke and the accelerated pre-stroke cognitive decline<sup>11</sup>. The incident decline  
87 might be caused by stroke itself, such as the acute tissue damage, or stroke severity<sup>12</sup>. The pre-stroke  
88 cognitive decline was associated with cognitive risk factors which had been existed before stroke.  
89 Hence, the mediated model could better explain the above two kinds of cognitive decline.  
90 Meanwhile, the moderated model would be used to learn the interaction term. For example, previous  
91 studies found the combination of hypertension and diabetes may be detrimental or even beneficial to  
92 the cognitive function among stroke patients<sup>13-16</sup>. The possible mechanisms included collateral  
93 circulation<sup>17</sup>.

94 Nowadays, only few studies learned the moderated and mediated effect in the domain of post-stroke  
95 cognitive function<sup>12,18-20</sup>. *Drozdowska 2020* studied the effects of cardiovascular disease on PSCI,  
96 and they found some risk factors were indirectly associated with the cognition after stroke<sup>19</sup>.  
97 However, the association hadn't been learned in China. Our study was conducted in Soochow, a city  
98 located in eastern China, with a life-expectancy over 85 years, which could reflect the medical  
99 situation of the population in the developed areas of China. The aim of our study was to explore the  
100 complex association between cardiovascular risk factors and the cognitive function in the acute phase  
101 after stroke.

## 102 **2 Method**

### 103 **2.1 Study design and participants**

104 This study employed a cross-sectional design. We recruited stroke patients who admitted to the  
105 stroke unit of the First Affiliated Hospital of Soochow University. Every patient in the stroke unit  
106 was provided with standardized treatment, and high dependency clinical and nursing care<sup>21</sup>. During  
107 June 2020 and May 2021, three senior vascular neurologists (YX Z, LC C and SS D) collected  
108 demographic and clinical data and conducted standardized cognitive assessments for all study  
109 patients. The inclusion criteria were: (1) Diagnosis of ischemic stroke was confirmed after admission  
110 by MRI<sup>22</sup>; (2) Patients were admitted within seven days of illness. The exclusion criteria were<sup>19,23,24</sup>:  
111 (1) Patients were unable to complete the cognitive test due to existing impairment, such as aphasia.  
112 (2) Patients had disturbance of consciousness causing by severe stroke. (3) a history of or current  
113 major depression, as determined by clinical reports or PHQ-9 of >9

## 114 **2.2 Standard protocol approvals**

115 All protocols followed those outlined in the Declaration of Helsinki and were approved by  
116 Institutional Review Board of The First Affiliated Hospital of Soochow University Hospital (IRB No.  
117 2021-172). In reporting our study, we followed Strengthening the Reporting of Observational Studies  
118 in Epidemiology (STROBE) guidelines<sup>25</sup>.

## 119 **2.3 Data availability statement**

120 Data were entered into the stroke registration system of the First Affiliated Hospital of Soochow  
121 University (SR-FHSU). Researchers could get data after the approval of the corresponding author  
122 and the ethic committee of the hospital.

## 123 **2.4 Predictors**

124 Predictors included demographic factors and cardiovascular risk factors. Demographic factors  
125 included age, sex, education, current smoking<sup>6</sup>. Age was treated as a continuous variable. Education  
126 level included the following category: primary school or less, middle school, high school and  
127 bachelor's degree or higher. Since almost all patients lived in the city of the hospital, we did not  
128 registered living area. Cardiovascular risk factors were those have been associated with post-stroke  
129 dementia: hypertension, diabetes mellitus, previous stroke, coronary disease, atrial fibrillation. Due to  
130 lack of previous medical record, we did not differentiate previous TIA and previous stroke.

## 131 **2.5 Mediators**

132 Every patient was evaluated by National Institute of Health Stroke Scale (NIHSS) on immediately  
133 upon admission to our stroke unit.

134 If the patients arrived in hospital within the time window or tissue window, they would firstly receive  
135 intravenous thrombolysis or thrombectomy in the emergency department. Then, they would be  
136 admitted to the ischemic stroke unit if they had no hemorrhage. These patients were assessed NIHSS  
137 score after arriving the stroke unit.

138 To achieve a more parsimonious model, we categorized NIHSS into four groups: no stroke signs (0),  
139 minor stroke (1-4), moderate stroke (5-15), and severe stroke (16-42).

## 140 **2.6 Cognitive outcome**

141 Cognitive function was evaluated within their 7-days of ischemic stroke or TIA. It was measured by  
142 the Chinese version of Mini-Mental State Examination (MMSE)<sup>26</sup>. We handled both MMSE score as  
143 continuous variables.

144 The MMSE is a widely used tool for the assessment of cognitive function in older participants. It  
145 reflects five aspects of cognitive function: orientation, registration, attention and calculation, recall,  
146 and language. The total score of MMSE ranges from 0 to 30.

## 147 **2.7 Statistical analysis**

148 As mediation analyses assuming the actual temporal order, we constructed the variables in the  
149 following orders. Stroke severity regressed on 11 predictors (including demographic and  
150 cardiovascular risk factors). Then, cognitive function regressed on stroke severity, and also regressed

151 on the 11 predictors. It reflected the direct effect of predictors and stroke severity on cognitive  
152 function, and the indirect effect of predictors on cognitive function, mediated by stroke severity. To  
153 avoid overfitting, we retained all predictors, no matter whether the path was significant<sup>27</sup>.

154 We developed a second stage dual moderated mediation model. Firstly, we assumed that  
155 hypertension and diabetes might moderate the following paths: (1) the direct path between predictor  
156 and outcome, and (2) the mediator path between predictor and mediator. That is, namely, to what  
157 extent the occurring of hypertension and diabetes (1) change the direct effect of predictors on  
158 cognitive function, and (2) change the indirect effect of predictors on cognitive function through  
159 stroke severity. We conducted the second stage dual moderated mediation model for atrial  
160 fibrillation, coronary disease and previous stroke, separately (Figure 1). For example, while exploring  
161 the moderated effect on atrial fibrillation, the model fitted four situations (presence or absence of  
162 hypertension  $\times$  presence or absence of diabetes)<sup>28</sup>. We then explored the moderated effect on other  
163 two predictors. Secondly, we removed interaction terms with a P value over 0.20. In the final model  
164 (Figure 2), we kept two interaction terms (arrow pointed from hypertension to arrow between atrial  
165 fibrillation and cognitive function, arrow between coronary disease and cognitive function).

166 The dependent variables were all continuous, therefore, we used the Maximum Likelihood  
167 Estimation (ML) method. It relatively would not be constricted to normal distribution and offer better  
168 precision for calculating confidence intervals (CI). A 1000-replication bootstrapping was used to  
169 estimate the CI<sup>29,30</sup>. The structural equation modelling was performed by Mplus 8.3 (Muthén &  
170 Muthén)<sup>31,32</sup>.

## 171 **3 Results**

172 A total of 300 ischemic stroke patients were included in our study. The baseline characteristics were  
173 shown in Table 1. The mean $\pm$ SD age of all participants were 63.5 $\pm$ 11.3 years. 74.3% of them were  
174 male. 44.6% of the participants hadn't finished primary school. 21.0% of the participants had a  
175 previous history of stroke. The median (interquartile range) of NHISS score was 3 (1, 5). The  
176 mean $\pm$ SD MMSE score of all participants was 17.0 $\pm$ 8.6.

### 177 **3.1 Final model contracture**

178 Firstly, three individual two-stage moderated mediation models were fitted to evaluated\ the  
179 moderation effect. Secondly, we opted to retain two interaction terms in the final model. We  
180 considered hypertension as a moderator for effects of atrial fibrillations and coronary disease on  
181 cognitive function. The final model was shown in Figure 2. The overall model fitted excellent, with  
182 SMSR=0.002.

### 183 **3.2 Mediation effects**

184 As for direct associations, there was a statistically significant association between the mediator and  
185 cognitive function. Higher NHISS score was directly associated with lower MMSE score ( $\beta$ =-1.531;  
186 95%CI=-3.015, -0.095; P=0.008). Age, sex, education, hypertension and atrial fibrillation were  
187 directly related to cognitive function (Table 2). One year of aging was associated with 0.114 points  
188 decrease in MMSE score ( $\beta$ =-0.114; 95%CI=-0.205, -0.032; P<0.001). Male had high MMSE score  
189 ( $\beta$  =-2.196; 95%CI=0.204, 4.358; P=0.009). High education was associated with high score  
190 ( $\beta$ =0.893; 95%CI=0.160, 1.662; P<0.001). Patients with hypertension or had lower score ( $\beta$ =-2.242;  
191 95%CI=-4.436, -0.242; P=0.003). Atrial fibrillation was also correlated with lower score ( $\beta$ =-4.930;

192 95%CI=-12.864, -0.126; P=0.048). There existed a trend that participants with coronary disease had  
193 higher cognitive function ( $\beta=2.193$ ; 95%CI=-1.103, 4.303; P=0.048).

194 For indirect associations, we observed no significant indirect effects of predictors on cognitive  
195 function (Table 3). None of the predictors were correlated with more severe strokes (Supplementary  
196 Table 1).

### 197 **3.3 Moderation effects**

198 The direct effects of atrial fibrillation and coronary disease could be moderated by hypertension. Co-  
199 occurring with hypertension, atrial fibrillation was associated with higher cognitive function ( $\beta$   
200 changed from -4.930 to -3.928). Through probing, we observed hypertension had a positive effect on  
201 cognitive function among patients with coronary disease ( $\beta=3.195$ ; 95%CI=-1.719, 8.482; P=0.106).

## 202 **4 Discussion**

203 Using a real-world sample of stroke unit patients, this article learned the relationship between  
204 cardiovascular risk factors, stroke severity and cognition. We found age, sex, education, atrial  
205 fibrillation, hypertension, and stroke severity were directly associated with lower cognitive function  
206 during the acute phase after stroke. For patients with atrial fibrillation or coronary disease, there was  
207 a trend that a combination hypertension was associated with better cognitive function. We also found  
208 a trend that patient with coronary disease probably had higher cognitive function.

209 Our findings were partly different from the study of *Drozdowska 2020*<sup>19</sup>. Drozdowska thought age  
210 and atrial fibrillation indirectly correlated with lower cognitive function through stroke severity. We  
211 found age, female, lower education, atrial fibrillation and hypertension was directly associated with  
212 cognitive function. In our dataset, the predictors were not associated with the mediator (stroke  
213 severity). The significance of indirect association needs both the significance of “predictor to  
214 mediator” and “mediator to outcome”. Moreover, Drozdowska hadn’t learned the effect of education.  
215 In Drozdowska’s country, England, sex was not associated with cognition. In China, older female  
216 had lower cognitive function, which had already supported by our previous nation-wide cohort study  
217 and many other articles<sup>33,34</sup>. In agreement with Drozdowska, we found a trend that hypertension had a  
218 positive effect on cognition among participants with coronary disease. We also found the positive  
219 effect of hypertension on patients with atrial fibrillation.

220 Several mechanisms could explain our findings. Hypertension was associated with lower cognitive  
221 function. It could bring with remodeling of cerebral vessels, lipohyalinosis, atherosclerosis, and  
222 oxidative stress. The pathological mechanism would in turn lead to cognitive decline, and other  
223 neurological dysfunctions<sup>35</sup>. Atrial fibrillation was independently associated with lower cognitive  
224 function, among participants with or without stroke<sup>36-38</sup>. A review discussed AF may result in a  
225 serious of mechanism that would cause lower cognition, such as cerebral hypoperfusion,  
226 inflammatory responses, silent ischemia, reduced brain volumes, and cerebral microbleeds. A  
227 combination of hypertension might reverse the effect of cerebral hypoperfusion, and therefore  
228 alleviated the negative effect. This was the potential explanation of our finding in the moderated  
229 analysis. It is widely reported that AF was associated with higher severity of stroke<sup>39,40</sup>. However, in  
230 our dataset, AF was not associated with NHISS score. We assumed this might be due to “survival  
231 bias”. Sever stroke patients with AF was unable to finish the cognitive test, and thus was excluded  
232 from the research. This also explains why also explain why the incidence rate of AF was lower than  
233 other stroke datasets (about 17%). Notably, it was reasonable that other predictors were not  
234 correlated with stroke severity<sup>19,40</sup>. The association between coronary disease and cognitive function



235 is still controversial<sup>41,42</sup>. The combination of higher blood pressure would bring with better collateral  
236 flow and better clinical outcomes<sup>43</sup>. This could explain the positive effect in our article. Although  
237 during the acute phase of stroke, high blood pressure would cause increasing infarct volume, brain  
238 edema, and hemorrhagic transformation. Every patient in our stroke unit received standardized  
239 treatment, including blood pressure control<sup>44</sup>.

240 To our knowledge, this was the first study learning the moderated and mediated association between  
241 cardiovascular risk factors, stroke severity, and cognitive function in among Chinese stroke patients.  
242 We believed that extensive researchers of the interaction between risk factors would achieve a better  
243 understanding of the neuro-degenerative process. However, we also had several disadvantages.  
244 Firstly, our data set had more males than females. This was due to the patient distribution of the  
245 hospital and district<sup>45</sup>. In the future research, we would try our best to improve this distribution.  
246 Second, our dataset included a few sever stroke patients. However, sever stroke patients always had  
247 problem in consciousness and language function. The disability prevented us from doing cognitive  
248 test. It has always been an intractable problem for studies learning cognitive function or dementia.  
249 Third, we could not distinguish previous TIA from previous stroke. We were not able to get the  
250 previous medical record of our patients, which were not admitted to our hospital before. Furthermore,  
251 in our district, patients had relative lower education level, and thus, had lower awareness rate of the  
252 previous history.

## 253 **5 Conclusions**

254 Our research explored the complex relationships between cardiovascular risk factors, stroke severity,  
255 and cognitive function. We highlighted the importance of comorbidity while learning the cognitive  
256 function after stroke. Future studies are needed to learn whether our findings are casual.

## 257 **6 Conflict of Interest**

258 The authors declare that the research was conducted in the absence of any commercial or financial  
259 relationships that could be construed as a potential conflict of interest.

## 260 **7 Author Contributions**

261 Qi Fang and Jianian Hua contributed to the conception and design of the study. Shanshan Diao, Yixiu  
262 Zhou and Licong Chen performed cognitive tests and collected medical data. Jianian Hua performed  
263 the statistical analysis. Jianian Hua wrote the first draft of the manuscript. Qi Fang reviewed the  
264 manuscript. All authors approved the final version of the paper.

## 265 **8 Funding**

266 This work was supported by the grants from the National Science Foundation of China (82071300),  
267 the Health Expert Training Program of Suzhou-Gusu District (GSWS2020002) and the Medical  
268 Team Introduction Program of Soochow (SZYJTD201802).

269

270

271

272

273

274

275

276 **9 References**

- 277 1. Strong K, Mathers C, Bonita R. Preventing stroke: saving lives around the world. *Lancet*  
278 *Neurol.* 2007;6(2):182-187.
- 279 2. Mijajlovic MD, Pavlovic A, Brainin M, Heiss WD, Quinn TJ, Ihle-Hansen HB, et al. Post-  
280 stroke dementia - a comprehensive review. *BMC Med.* 2017;15(1):11.
- 281 3. Hurford R, Charidimou A, Fox Z, Cipolotti L, Werring DJ. Domain-specific trends in  
282 cognitive impairment after acute ischaemic stroke. *J Neurol.* 2013;260(1):237-241.
- 283 4. 2020 Alzheimer's disease facts and figures. *Alzheimers Dement.* 2020.
- 284 5. Arvanitakis Z, Shah RC, Bennett DA. Diagnosis and Management of Dementia: Review.  
285 *JAMA.* 2019;322(16):1589-1599.
- 286 6. Luscher TF. The heart and the brain: cardiovascular risk factors, atrial fibrillation, and  
287 dementia. *Eur Heart J.* 2019;40(28):2271-2275.
- 288 7. Cox SR, Lyall DM, Ritchie SJ, Bastin ME, Harris MA, Buchanan CR, et al. Associations  
289 between vascular risk factors and brain MRI indices in UK Biobank. *Eur Heart J.*  
290 2019;40(28):2290-2300.
- 291 8. Xie W, Zheng F, Yan L, Zhong B. Cognitive Decline Before and After Incident Coronary  
292 Events. *J Am Coll Cardiol.* 2019;73(24):3041-3050.
- 293 9. Gottesman RF, Hillis AE. Predictors and assessment of cognitive dysfunction resulting from  
294 ischaemic stroke. *Lancet Neurol.* 2010;9(9):895-905.
- 295 10. Henon H, Durieu I, Guerouaou D, Lebert F, Pasquier F, Leys D. Poststroke dementia:  
296 incidence and relationship to prestroke cognitive decline. *Neurology.* 2001;57(7):1216-1222.
- 297 11. Levine DA, Kabeto M, Langa KM, Lisabeth LD, Rogers MA, Galecki AT. Does Stroke  
298 Contribute to Racial Differences in Cognitive Decline? *Stroke.* 2015;46(7):1897-1902.
- 299 12. Yatawara C, Ng KP, Chander R, Kandiah N. Associations between lesions and domain-  
300 specific cognitive decline in poststroke dementia. *Neurology.* 2018;91(1):e45-e54.
- 301 13. Ergul A, Abdelsaid M, Fouda AY, Fagan SC. Cerebral neovascularization in diabetes:  
302 implications for stroke recovery and beyond. *J Cereb Blood Flow Metab.* 2014;34(4):553-  
303 563.
- 304 14. Ferdinandy P, Hausenloy DJ, Heusch G, Baxter GF, Schulz R. Interaction of risk factors,  
305 comorbidities, and comedications with ischemia/reperfusion injury and cardioprotection by  
306 preconditioning, postconditioning, and remote conditioning. *Pharmacol Rev.*  
307 2014;66(4):1142-1174.
- 308 15. Hedera P, Bujdakova J, Traubner P, Pancak J. Stroke risk factors and development of  
309 collateral flow in carotid occlusive disease. *Acta Neurol Scand.* 1998;98(3):182-186.



- 310 16. Wufuer A, Wubuli A, Mijiti P, Zhou J, Tuerxun S, Cai J, et al. Impact of collateral circulation  
311 status on favorable outcomes in thrombolysis treatment: A systematic review and meta-  
312 analysis. *Exp Ther Med*. 2018;15(1):707-718.
- 313 17. Shuaib A, Butcher K, Mohammad AA, Saqqur M, Liebeskind DS. Collateral blood vessels in  
314 acute ischaemic stroke: a potential therapeutic target. *Lancet Neurol*. 2011;10(10):909-921.
- 315 18. Abdin E, Chong SA, Peh CX, Vaingankar JA, Chua BY, Verma S, et al. The mediational role  
316 of physical activity, social contact and stroke on the association between age, education,  
317 employment and dementia in an Asian older adult population. *BMC Psychiatry*.  
318 2017;17(1):98.
- 319 19. Drozdowska BA, Elliott E, Taylor-Rowan M, Shaw RC, Cuthbertson G, Langhorne P, et al.  
320 Cardiovascular risk factors indirectly affect acute post-stroke cognition through stroke  
321 severity and prior cognitive impairment: a moderated mediation analysis. *Alzheimers Res*  
322 *Ther*. 2020;12(1):85.
- 323 20. Kimonides S, Cavuoto MG, De Silva L, Kinsella GJ. The role of subjective cognitive  
324 complaints and depressive symptoms in social re-integration following stroke: a mediation  
325 explanation in a cross-sectional sample. *Top Stroke Rehabil*. 2018:1-7.
- 326 21. Prabhakaran S, Ruff I, Bernstein RA. Acute stroke intervention: a systematic review. *JAMA*.  
327 2015;313(14):1451-1462.
- 328 22. Sacco RL, Kasner SE, Broderick JP, Caplan LR, Connors JJ, Culebras A, et al. An updated  
329 definition of stroke for the 21st century: a statement for healthcare professionals from the  
330 American Heart Association/American Stroke Association. *Stroke*. 2013;44(7):2064-2089.
- 331 23. Roman GC, Tatemichi TK, Erkinjuntti T, Cummings JL, Masdeu JC, Garcia JH, et al.  
332 Vascular dementia: diagnostic criteria for research studies. Report of the NINDS-AIREN  
333 International Workshop. *Neurology*. 1993;43(2):250-260.
- 334 24. Lees RA, Hendry Ba K, Broomfield N, Stott D, Lerner AJ, Quinn TJ. Cognitive assessment  
335 in stroke: feasibility and test properties using differing approaches to scoring of incomplete  
336 items. *Int J Geriatr Psychiatry*. 2017;32(10):1072-1078.
- 337 25. von Elm E, Altman DG, Egger M, Pocock SJ, Gotsche PC, Vandenbroucke JP, et al. The  
338 Strengthening the Reporting of Observational Studies in Epidemiology (STROBE) statement:  
339 guidelines for reporting observational studies. *Epidemiology*. 2007;18(6):800-804.
- 340 26. Katzman R, Zhang MY, Ouang Ya Q, Wang ZY, Liu WT, Yu E, et al. A Chinese version of  
341 the Mini-Mental State Examination; impact of illiteracy in a Shanghai dementia survey. *J*  
342 *Clin Epidemiol*. 1988;41(10):971-978.
- 343 27. Aiken LS, West SG. *Multiple regression: Testing and interpreting interactions*. Thousand  
344 Oaks, CA, US: Sage Publications, Inc; 1991.
- 345 28. Hayes AF. Partial, conditional, and moderated moderated mediation: Quantification,  
346 inference, and interpretation. *Communication Monographs*. 2018;85(1):4-40.
- 347 29. Shrout PE, Bolger N. Mediation in experimental and nonexperimental studies: new  
348 procedures and recommendations. *Psychol Methods*. 2002;7(4):422-445.
- 349 30. Fairchild AJ, McQuillin SD. Evaluating mediation and moderation effects in school  
350 psychology: a presentation of methods and review of current practice. *J Sch Psychol*.  
351 2010;48(1):53-84.

- 352 31. Muthén LK MB. Mplus user's guide. 2021.
- 353 32. Stride CB, Gardner, S.E., Catley, N., & Thomas, F. Mplus Code for Mediation, Moderation  
354 and Moderated Mediation Models. 2015.
- 355 33. Hua J, Qiao Y, Ke C, Shen Y. Higher visit-to-visit total cholesterol variability is associated  
356 with lower cognitive function among middle-aged and elderly Chinese men. *Sci Rep.*  
357 2020;10(1):15555.
- 358 34. Hua J, Sun H, Shen Y. Improvement in sleep duration was associated with higher cognitive  
359 function: a new association. *Aging (Albany NY).* 2020;12.
- 360 35. de Menezes ST, Giatti L, Brant LCC, Griep RH, Schmidt MI, Duncan BB, et al.  
361 Hypertension, Prehypertension, and Hypertension Control: Association With Decline in  
362 Cognitive Performance in the ELSA-Brasil Cohort. *Hypertension.* 2021;77(2):672-681.
- 363 36. Chander RJ, Lim L, Handa S, Hiu S, Choong A, Lin X, et al. Atrial Fibrillation is  
364 Independently Associated with Cognitive Impairment after Ischemic Stroke. *J Alzheimers*  
365 *Dis.* 2017;60(3):867-875.
- 366 37. Graff-Radford J, Madhavan M, Vemuri P, Rabinstein AA, Cha RH, Mielke MM, et al. Atrial  
367 fibrillation, cognitive impairment, and neuroimaging. *Alzheimers Dement.* 2016;12(4):391-  
368 398.
- 369 38. Stefanidis KB, Askew CD, Greaves K, Summers MJ. The Effect of Non-Stroke  
370 Cardiovascular Disease States on Risk for Cognitive Decline and Dementia: A Systematic  
371 and Meta-Analytic Review. *Neuropsychol Rev.* 2018;28(1):1-15.
- 372 39. Dong S, Guo J, Fang J, Hong Y, Cui S, He L. Low-dose statin pretreatment reduces stroke  
373 severity and improves functional outcomes. *J Neurol.* 2019;266(12):2970-2978.
- 374 40. Jung YH, Kim YD, Kim J, Han SW, Oh MS, Lee JS, et al. Initial Stroke Severity in Patients  
375 With Atrial Fibrillation According to Antithrombotic Therapy Before Ischemic Stroke.  
376 *Stroke.* 2020;51(9):2733-2741.
- 377 41. Sundbøll J, Horváth-Puhó E, Adelborg K, Schmidt M, Pedersen L, Bøtker HE, et al. Higher  
378 Risk of Vascular Dementia in Myocardial Infarction Survivors. *Circulation.*  
379 2018;137(6):567-577.
- 380 42. Gottesman RF. Survivor's Remorse: Is There an Increased Risk of Dementia After Surviving  
381 a Myocardial Infarction? *Circulation.* 2018;137(6):578-580.
- 382 43. Hong L, Cheng X, Lin L, Bivard A, Ling Y, Butcher K, et al. The blood pressure paradox in  
383 acute ischemic stroke. *Ann Neurol.* 2019;85(3):331-339.
- 384 44. Zhu J, Shen X, Han C, Mei C, Zhou Y, Wang H, et al. Renal Dysfunction Associated with  
385 Symptomatic Intracranial Hemorrhage after Intravenous Thrombolysis. *J Stroke Cerebrovasc*  
386 *Dis.* 2019;28(11):104363.
- 387 45. Li T, Zhu J, Fang Q, Duan X, Zhang M, Diao S, et al. Association of H-Type Hypertension  
388 with Stroke Severity and Prognosis. *Biomed Res Int.* 2018;2018:8725908.

389

390

391

392

393

394 **10 Tables**

395

396 Table 1 Demographic, clinical and cognitive data of all participants

---

| Variable               |                   |
|------------------------|-------------------|
| Age (years)            |                   |
| Range                  | 24 - 87           |
| Median (IQR)           | 65.0 (56.0, 79.0) |
| Mean (SD)              | 63.5 (11.3)       |
| Male n (%)             | 223 (74.3)        |
| Education n (%)        |                   |
| Primary school or less | 134 (44.6)        |
| Middle school          | 82 (27.3)         |
| High school            | 54 (18.0)         |
| Master or higher       | 30 (10.0)         |
| Smoking n (%)          | 106 (35.3)        |
| Hypertension n (%)     | 234 (78.0)        |

---

---

|                                 |                   |
|---------------------------------|-------------------|
| Diabetes mellitus n (%)         | 111 (37.0)        |
| Previous stroke n (%)           | 63 (21.0)         |
| Atrial fibrillation n (%)       | 26 (8.7)          |
| Coronary disease n (%)          | 21 (7.0)          |
| Stroke severity (NHSS score)    |                   |
| Range                           | 0 – 25            |
| Median (IQR)                    | 3 (1, 5)          |
| Mean (SD)                       | 3.6 (3.5)         |
| No stroke signs                 | 48 (16.0)         |
| Minor stroke                    | 167 (55.7)        |
| Moderate stroke                 | 82 (27.3)         |
| Severe stroke                   | 3 (1.0)           |
| Cognitive function (MMSE score) |                   |
| Range                           | 2 - 30            |
| Median (IQR)                    | 25.0 (19.0, 28.0) |
| Mean (SD)                       | 22.8 (6.5)        |

---

---

Cognitive function (MOCA score)

|              |                   |
|--------------|-------------------|
| Range        | 0 - 30            |
| Median (IQR) | 18.0 (12.0, 24.0) |
| Mean (SD)    | 17.0 (8.6)        |
| Missing      | 3                 |

---

397

398

399

400

401

402

403

404

405

406

407

408

409

410

411

412

413

414

415

416

417 Table 2. Direct associations between predictors and cognitive function

418

|                                       | Unstandardized coefficient (95% CI) | P value |
|---------------------------------------|-------------------------------------|---------|
| Age                                   | -0.114 (-0.205, -0.032)             | <0.001  |
| Sex (male)                            | 2.196 (0.204, 4.359)                | 0.009   |
| Education                             | 0.893 (0.160, 1.662)                | <0.001  |
| Smoking                               | 0.664 (-1.198, 2.629)               | 0.378   |
| Hypertension                          | -2.242 (-4.436, -0.242)             | 0.003   |
| Diabetes mellitus                     | -0.120 (-2.013, 1.651)              | 0.870   |
| Previous stroke                       | -0.992 (-3.344, 1.238)              | 0.259   |
| Atrial fibrillation                   | -4.930 (-12.864, -0.126)            | 0.048   |
| Coronary disease                      | 2.193 (-1.103, 4.303)               | 0.054   |
| Atrial fibrillation<br>× hypertension | -3.928 (-7.954, 0.029)              | 0.009   |
| Coronary disease<br>× hypertension    | 3.195 (-1.719, 8.482)               | 0.106   |

419

420

421

422

423

424

425

426



427 Table 3. Indirect associations between predictors and cognitive function

428

| Variable            | Unstandardized coefficient (95% CI) | P value |
|---------------------|-------------------------------------|---------|
| Age                 | 0.001 (-0.002, 0.040)               | 0.149   |
| Sex (male)          | 0.006 (-0.456, 0.463)               | 0.967   |
| Education           | 0.079 (-0.027, 0.297)               | 0.185   |
| Smoking             | -0.144 (-0.744, 0.218)              | 0.381   |
| Hypertension        | 0.285 (-0.049, 1.240)               | 0.158   |
| Diabetes mellitus   | -0.085 (-0.596, 0.238)              | 0.550   |
| Previous stroke     | 0.016 (-0.448, 0.634)               | 0.928   |
| Atrial fibrillation | -0.313 (-1.237, 0.252)              | 0.242   |
| Coronary disease    | -0.183 (-1.127, 0.335)              | 0.438   |

429

430

431

432

433

434

435

436

437

438

439 **11 Figure legends**

- 440 Figure 1. The second stage dual moderated mediation model. We examined the moderated effect on  
441 atrial fibrillation, coronary disease and previous stroke, separately.
- 442 Figure 2. The final diagram of the moderated and mediation model.
- 443

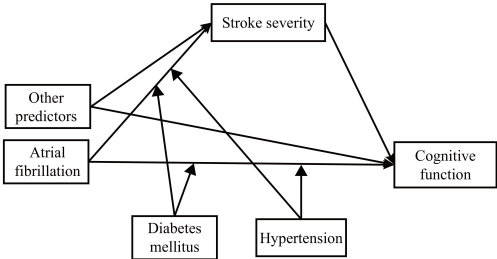

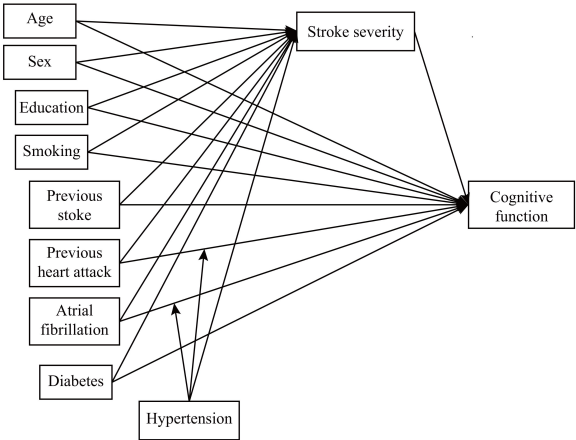

Source: https://medrxiv.org/content/10.1101/2021.07.05.21260009v1.full.pdf
